# Supplementary material for: Comprehensive investigation of the mutual effect of Ce and W species in the NH3-SCR catalyst
Source: Royal Society of Chemistry journal article supplement (doi:10.1039/d3nj04565j), 2023-11-17
Supplement: d3nj04565j1.pdf [file d3nj04565j1.pdf]

## **Comprehensive investigation of the mutual effect of Ce and W species in NH<sub>3</sub>-SCR catalyst**

Jiaying Li<sup>a</sup>, Hongfeng Chen<sup>b</sup>, Kaihao Fan<sup>a</sup>, Minger Luo<sup>b</sup>, Yan Luo<sup>b</sup>, Zhiming Sui<sup>a</sup>,  
Yanghui Wang<sup>a</sup>, Xuesong Liu<sup>a\*</sup>

*a College of Chemistry and Chemical Engineering, Shaoxing University, Shaoxing  
Zhejiang 312000, PR China*

*b Shaoxing Testing Institute of Quality and Technical Supervision, Shaoxing 312000,  
Zhejiang Province, China*

1. Fig. S1 The NH<sub>3</sub>-SCR activity of pure CeO<sub>2</sub> and WO<sub>3</sub> oxides.
2. Fig. S2 H<sub>2</sub>-TPR profiles of pure CeO<sub>2</sub> and WO<sub>3</sub> oxides.

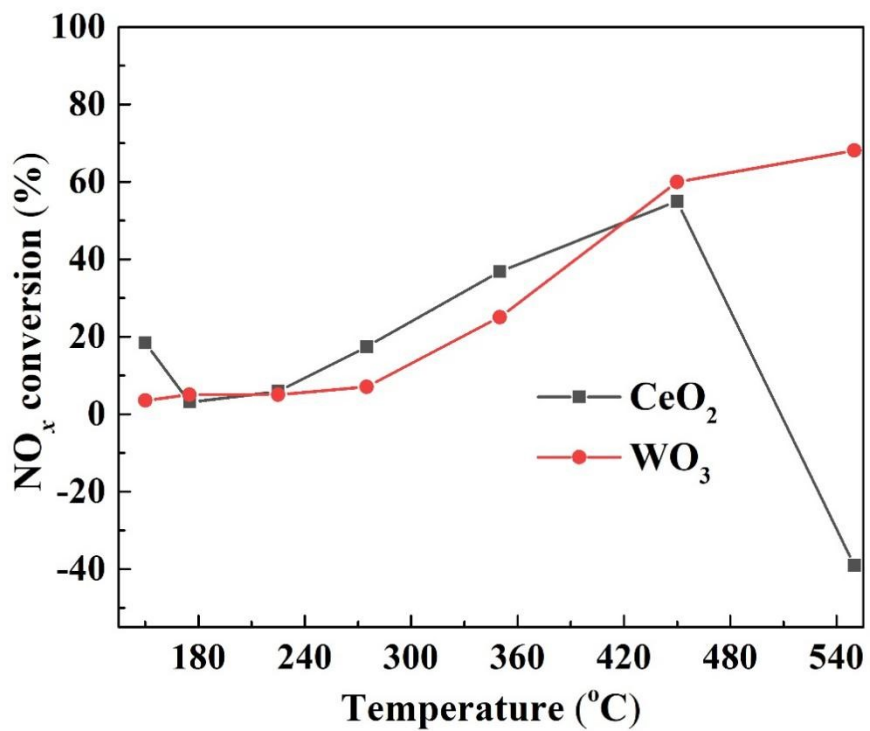

Fig. S1 The NH<sub>3</sub>-SCR activity of pure CeO<sub>2</sub> and WO<sub>3</sub> oxides.

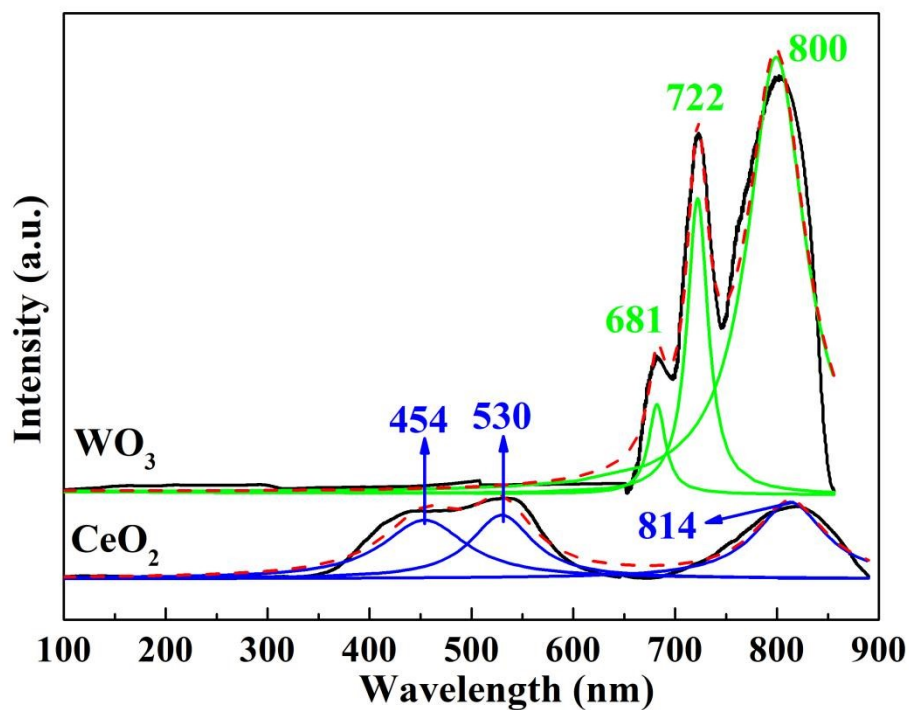

Fig. S2 H<sub>2</sub>-TPR profiles of pure CeO<sub>2</sub> and WO<sub>3</sub> oxides.
